# 1 **Cellulosic wall thickenings restrict cell expansion to shape the 3D** 2 **puzzle sclereids of the walnut shell**

3

4 Sebastian J. Antreich\*, Nannan Xiao, Jessica C. Huss, and Notburga Gierlinger

5

6 Institute for Biophysics, Department of Nanobiotechnology

7 University of Natural Resources and Life Sciences,

8 1190 Vienna, Austria

9

10 \* Corresponding author: [sebastian.antreich@boku.ac.at](mailto:sebastian.antreich@boku.ac.at)

11

12

## 13 **Abstract**

14 Walnut (*Juglans regia*) kernels are protected by a tough shell consisting of polylobate sclereids that  
15 interlock into a 3D puzzle. The shape transformations from isodiametric to lobed cells is well  
16 documented for 2D pavement cells, but not for 3D puzzle sclereids. Here, we tackle the morphogenesis  
17 of these cells by using a combination of different imaging techniques. Serial face-microtomy enabled us  
18 to reconstruct tissue growth of whole walnut fruits in 3D and serial block face-scanning electron  
19 microscopy exposed cell shapes and their transformation in 3D during shell tissue development. In  
20 combination with Raman and fluorescence microscopy we revealed multiple loops of cellulosic  
21 thickenings in cell walls, acting as stiff restrictions during cell expansion and leading to the lobed cell  
22 shape. Our findings contribute to a better understanding of the 3D shape transformation of polylobate  
23 sclereids and the role of pectin and cellulose within this process.

24

## 25 **Introduction**

26 Fruits of the Persian walnut (*J. regia*) are composed of a green and fleshy husk (fused bract and  
27 bracteoles), a dry and hard shell (pericarp), and a tasty and healthy kernel protected by those two  
28 envelopes. A closer look into the shell reveals polylobate sclereid cells tightly interlocked in 3D with  
29 their neighbours, which leads to a higher contact area between cells and superior mechanical properties  
30 compared to tissues with isodiametric cells like in pine seed coats (Antreich et al. 2019). Furthermore,  
31 the irregularly shaped cells are also found in shells of pecan and pistachio (Huss et al. 2020). The  
32 morphogenesis of such shell tissues is controlled by physical forces as well as biochemical signalling  
33 (Landrein & Ingram, 2019). So, using only one cell type may simplify the coordination of growth of the  
34 tissue compared to shells with a layered arrangement of different tissues found in *Macadamia* (Schüler  
35 et al. 2014), which make the coordination of growth more complicated.

36 In general, cells of plant tissues divide first and expand later during the fast growth phase of the plant  
37 organ (Gonzalez et al. 2012). During expansion, hydrostatic pressure (turgor) expands the whole cell,  
38 stretches the cell wall and forces it to loosen some parts, followed by adding new materials to grow (for  
39 a review, see Cosgrove 2018). Root and stem cells expand mainly in one axis to push the root down into  
40 the ground or the stem up into the air (Baskin 2005, Daher et al. 2018). Nevertheless, there are tissues  
41 where the cells start to expand irregularly, forming lobes like in epidermal cells of leaves (Vöfély et al.  
42 2018). The irregular shape of the cell helps to reduce mechanical stress on the cell wall caused by high  
43 turgor pressure. For example, in growing epidermal cells of *A. thaliana*, lobes reduce the overall  
44 mechanical stresses on the cell and tissue level when cell size increases, however, high stress values  
45 become visible at the indents between the lobes (neck regions) (Sapala et al. 2018).

46 These irregular cell shapes generate certain stress patterns which are strongly interlinked with cell wall  
47 composition and its mechanical properties (Kierzkowski et al. 2019). The primary cell wall is composed  
48 mainly of polysaccharides like cellulose, which is the main load-bearing component; pectin, which is  
49 important for cell wall flexibility; and hemicelluloses, which cross-link cellulose microfibrils  
50 (Lampugnani et al. 2018). Cellulose is the stiffer part of the cell wall due to the microfibrillar  
51 arrangement and is linked to the cortical microtubule distribution in the cell (Bidhendi and Geitmann  
52 2016, Gutierrez et al. 2009). These microtubules tend to orient along higher stressed cell wall regions,  
53 where more cellulose becomes deposited, thus increases the stiffness of the cell wall (Sampathkumar et  
54 al. 2014). Pectin does not only play a central role in cell-cell adhesion in the middle lamella (Marry et  
55 al. 2006), but also in lobe initialisation by changing the stiffness of the cell wall (Haas et al. 2020, Majda  
56 et al. 2017, Peaucelle et al. 2015). Recently, a two-step mechanism for lobe formation has been  
57 proposed, where de-methylated pectin increases stiffness at the future indent, which leads to cell wall  
58 undulation associated with higher stressed regions. This furthermore favours the alignment of  
59 microtubules and increased accumulation of cellulose fibrils at the indent, which slows down expansion  
60 at this location during growth (Altartouri et al. 2019, Bidhendi et al. 2019).

61 Most studies on irregular cell shapes focus on the epidermal pavement cells of *A. thaliana* or on  
62 epidermal cells of other dicotyledons, monocotyledons and ferns (Sotiriou et al. 2018, Vöfély et al.  
63 2018). In the epidermis, mainly the anticlinal walls undulate, while the periclinal walls are straight,  
64 which makes it easy to measure with confocal laser scanning microscopes in 2D. Based on that, shape  
65 descriptors are also established in 2D (Poeschl et al. 2020, Sapala et al. 2018, Altartouri et al. 2019,  
66 Vöfély et al. 2018). But how do the sclereid puzzle cells form in 3D in walnut shells?

67 The challenge in walnut is that the husk covers the shell tissue during fruit growth and cells in the shell  
68 expand irregularly in all directions. In this study, we uncover this morphogenesis for the first time in 3D  
69 by using serial block face-scanning electron microscope (SBF-SEM). Based on the 3D reconstructions,  
70 we characterise cell shapes with different shape descriptors. We also investigate the developing sclereids  
71 with Raman spectroscopy to understand the chemical contributions to lobe formation. Finally, we  
72 suggest a possible mechanism for shaping walnut puzzle sclereids in 3D.

73

## 74 **Results**

### 75 *Walnut and tissue growth*

76 Our first step to track lobe formation in walnuts was a detailed monitoring of the growth and tissue  
77 development during the year of 2019. The strongest increase in weight and size occurred between 6 to  
78 10 weeks after catkin formation (WAC), corresponding to 3<sup>rd</sup> of June to 1<sup>st</sup> of July, when walnut weight  
79 increased 27-times (from  $1.7 \pm 0.2$  g to  $46.5 \pm 4.3$  g) together with length and width (Fig. 1a). From  
80 WAC 4 to WAC 12, tissue development was reconstructed from picture stacks made by serial face-  
81 microtomy (SF-M), which reveal a strong increase of shell volume in this period (Fig. 1b-c, Supp. video.  
82 1). In the beginning (WAC 4-6), the kernel is only presented as a small embryo, which expands fast into  
83 the already formed cavity (locule) shaped by the inner part of the shell (Supp. Fig1), until it filled this  
84 space at WAC 10. At the same time, the shell reached its final size and lignification started, initially  
85 along the suture from tip to base.

86

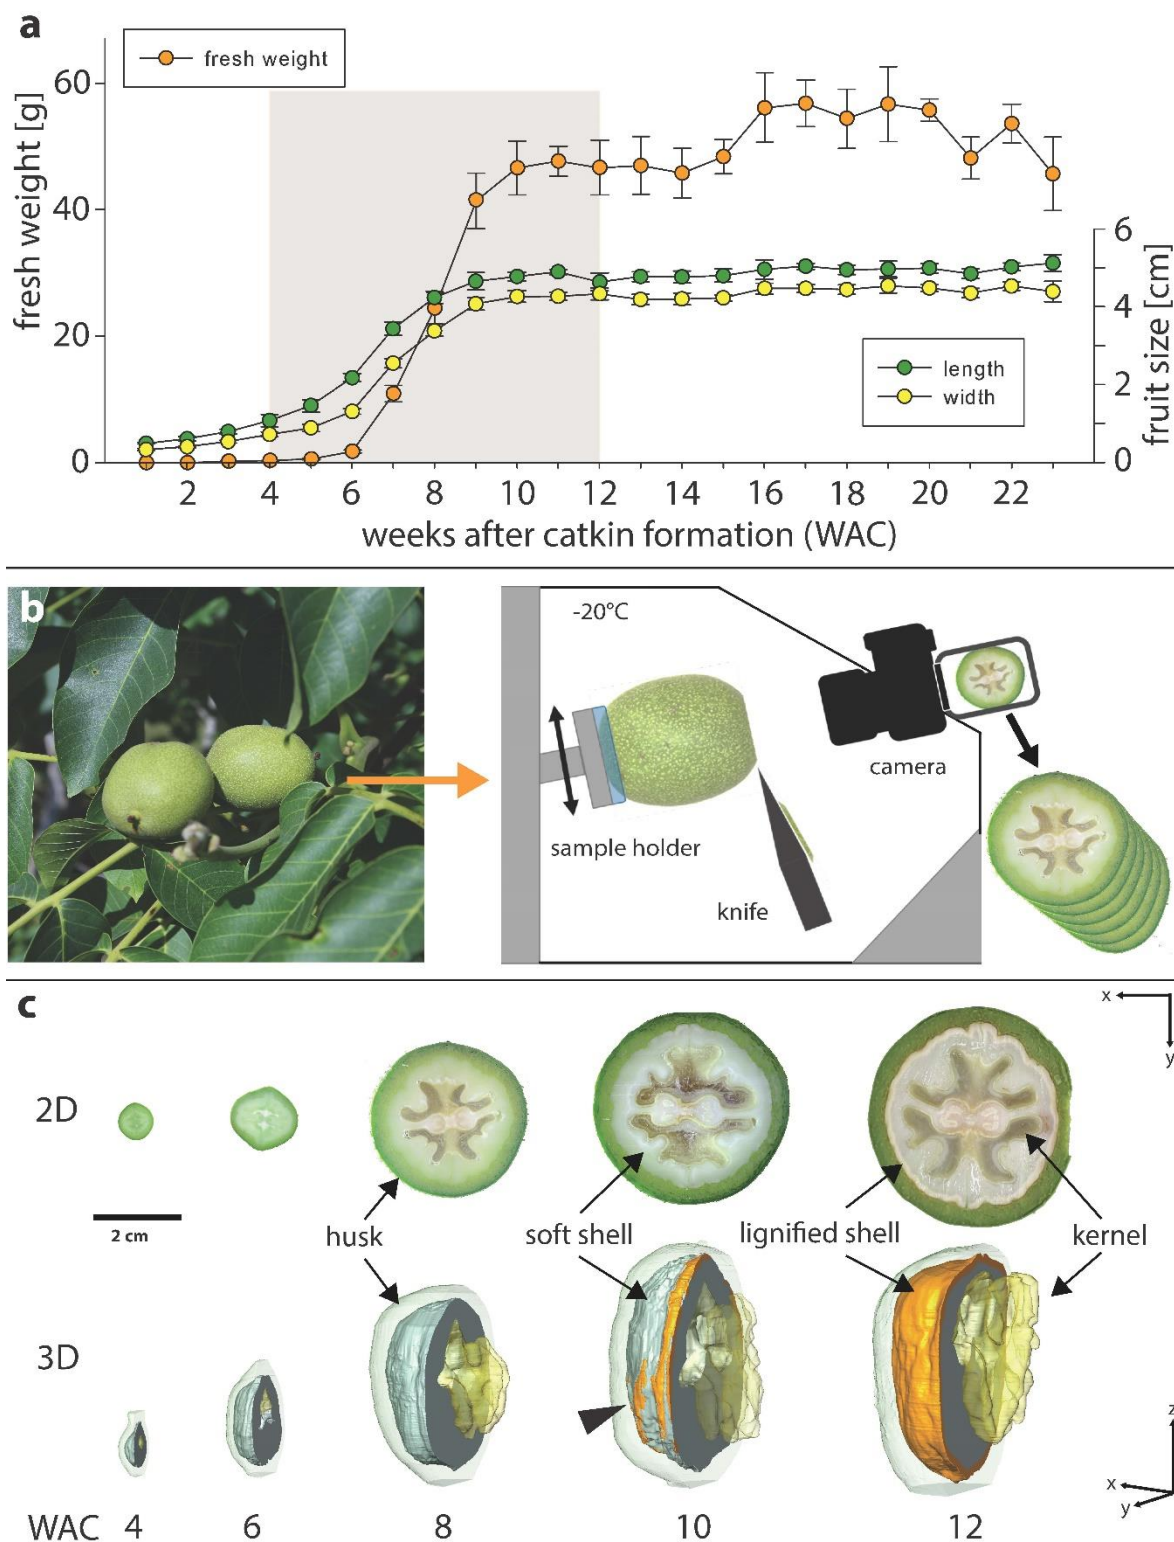

87  
 88 **Fig. 1 Walnut fruit development:** a) Fresh weight, length and width of walnut samples 1-23 weeks after catkin  
 89 formation (WAC), corresponding to end of April to end of September in 1-week intervals. The grey area is showing  
 90 the period chosen for serial face-Microtomy (SF-M) (n = 5, error bars = SD). b) Freshly collected walnuts were  
 91 transferred into the cryostat microtome chamber, sequentially cut and photographed. c) 3D reconstructions from  
 92 SF-Microtomy show changes of the internal built-up of the walnut (kernel, soft shell, lignified shell and husk).  
 93 Lignification starts along the suture but also appeared at some areas far away from the suture (arrowhead).

94  
 95

96 *Cell size and shape changes*

97 During the 8 weeks of tissue growth, the cell shapes were analysed with SBF-SEM followed by 3D  
98 reconstructions (Fig. 2a). This detailed investigation showed a strong increase in cell size during the  
99 expansion phase of the (drupaceous) nut (Fig. 2b). Mainly from week 6 to week 10 cell size increased  
100 13-fold (from  $7.1 \times 10^3 \mu\text{m}^3$  to  $94.1 \times 10^3 \mu\text{m}^3$ ). Cell surface area expanded in the same period 8-fold  
101 (from  $2.2 \times 10^3 \mu\text{m}^2$  to  $17.6 \times 10^3 \mu\text{m}^2$ ) (Supp. Fig. 2). To characterise the transition from small  
102 isodiametric cells to large polylobate cells according to reconstructions of the SBF-SEM stacks (Fig.  
103 2c) cell shape descriptors for 3D development are introduced.

104

105

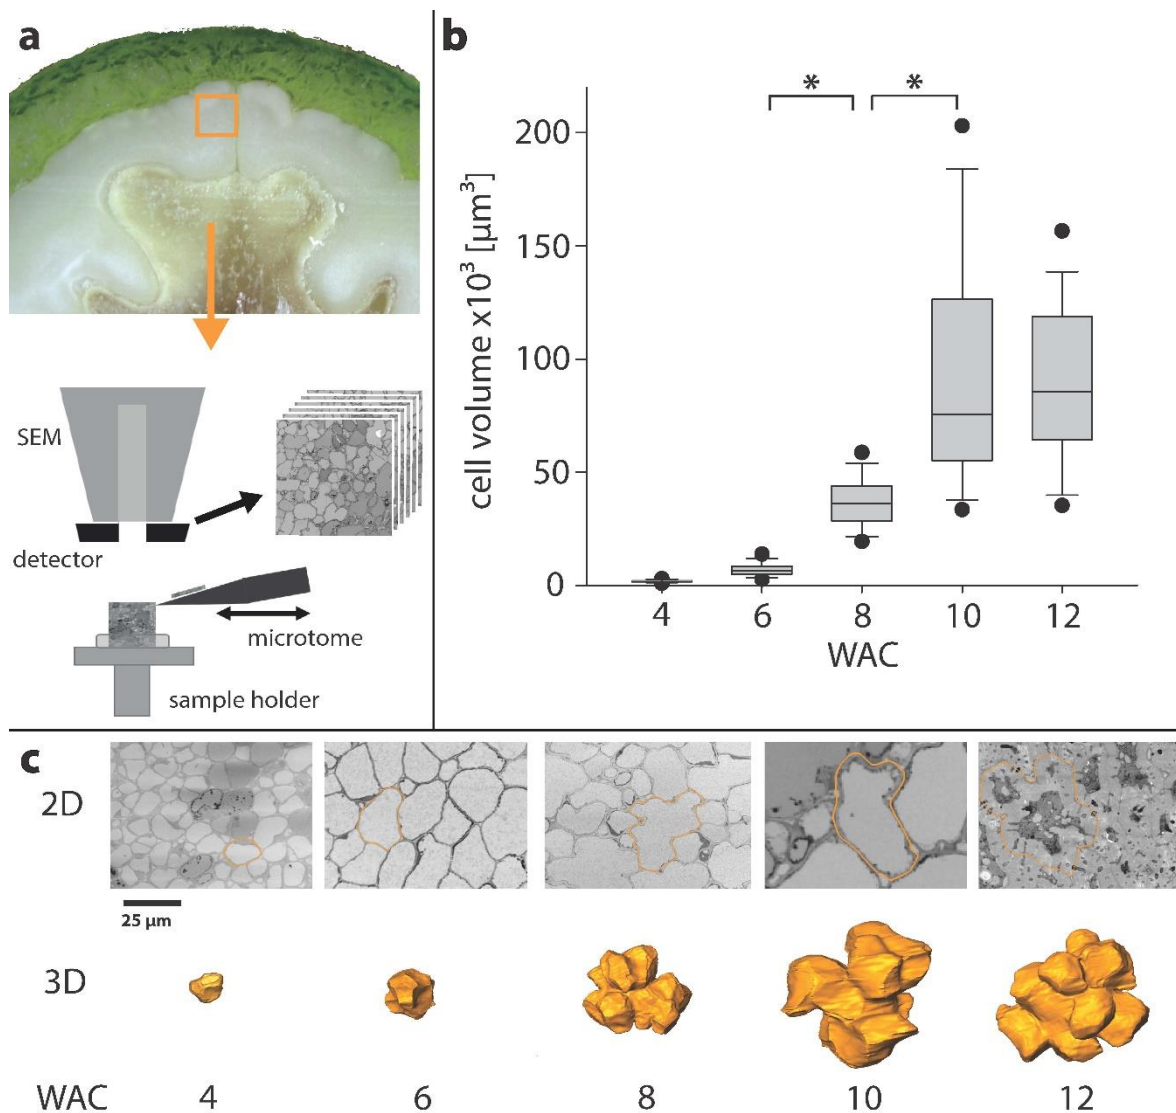

106

107 **Fig. 2 Cell size and shape development:** a) Small pieces of shell close to the suture were cut out, fixed and  
108 embedded for the SBF-SEM to produce serial cuts. b) Cell volume based on reconstructions during the growing  
109 period in weeks after catkin formation (WAC) ( $n > 50$ , points = 5/95 percentile). c) SBF-SEM images represent  
110 each developmental stage. The cells marked on the picture have a volume closest to the average value from b)  
111 and are shown as 3D reconstruction below (scale bar is the same for all pictures).

112 Shape descriptors like circularity (form factor), solidity or convexity exist for 2D pavement cells of *A.*  
113 *thaliana* (Poeschl et al. 2020). To describe the changes of the walnut cells during development we also  
114 used solidity, which represents the ratio between cell volume and convex hull volume (Fig. 3a). The  
115 solidity was  $0.84 \pm 0.05$  at week 4 and dropped to  $0.61 \pm 0.06$  at week 12.

116 Another tool to describe cell shape changes in 2D and 3D is the skeleton of the cell. The cell shape is  
117 reduced to the innermost line and the skeleton endpoints correspond to the number of lobes (Fig. 3b).  
118 During morphogenesis the main lobe number increased steadily from isodiametric cells (2 lobes) to  
119 polylobate cells with around 12 lobes.

120 Turgor-pressure causes the cell wall to bulge outwards, leading to mechanical stress on the cell wall  
121 (Cosgrove 2018). In pavement cells of *A. thaliana*, the largest empty circle (LEC) that fits into the cells  
122 was used as a proxy for the maximal stress on the cell wall (Sapala et al. 2018). But these cells have a  
123 relative constant vertical thickness, whereas the walnut cells expand non-uniformly in all directions  
124 during growth. To extend this factor into 3D, we introduced the largest empty sphere (LES), which  
125 describes the biggest sphere that fits into the cell volume (Fig. 3c). With growing cell volume, the LES  
126 of the growing walnut cells increased less compared to a hypothetical cell without lobes (represented by  
127 a perfect sphere). Similar to *A. thaliana*, the maximal cell wall stress during cell expansion increased  
128 around 5-times less by the formation of lobes.

129 With decreasing solidity, the cell became more lobed, which resulted in an increase of the cell surface  
130 area. Together with the fact that the number of cell neighbours stayed constant during development  
131 (Supp. Fig 3), cell contact area between neighbouring cells increased strongly (8-fold) from week 6 to  
132 week 10 (Fig.3d). 3D reconstruction of single cells revealed that contact areas become separated by  
133 intercellular spaces (ICS) resulting in more but smaller single areas.

134

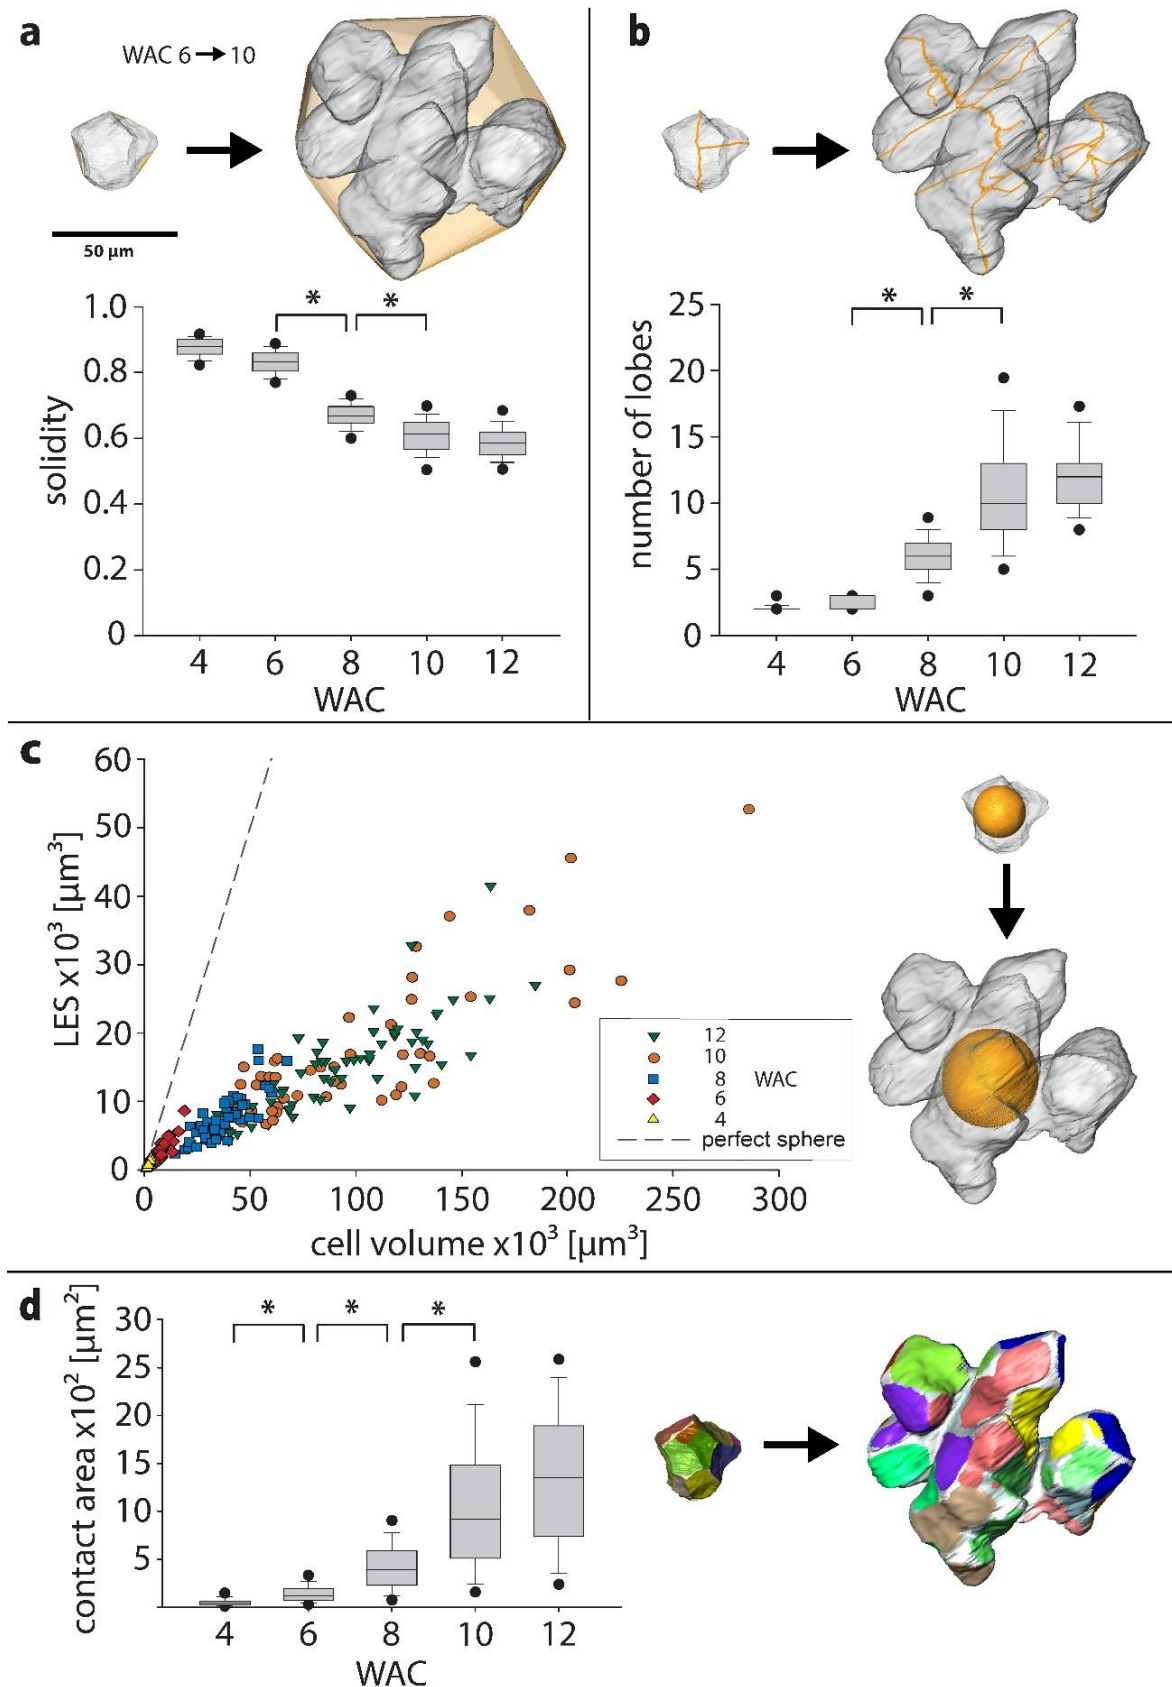

135

136 **Fig. 3 Cell shape descriptors in 3D:** a-d) Changes in cell shape descriptors from week 6 to week 10 illustrated  
 137 on the same set of cells (small cell from June 3<sup>rd</sup>, big cell from July 1<sup>st</sup>). During this interval we can observe a)  
 138 a decrease of solidity, b) an increase in the number of lobes after skeletonization, c) a 5-times lower increase of the  
 139 largest empty sphere (LES) compared to a hypothetical spherical cell and d) a strong increase of cell contact area  
 140 of neighboring cells and intercellular spaces (non-colored).

141

142 *Cell wall changes*

143 The changes in cellulose deposition were followed during the developmental period by staining  
144 microsections with calcofluor white (Fig. 4a). At WAC 8 and 10 loops of cellulose become visible, also  
145 seen by light microscopy (Supp. Video 2). Additionally, cell wall thickness of single cells in week 8  
146 were analysed in detail in SBF-SEM reconstructions. The average thickness was  $0.88 \pm 0.22 \mu\text{m}$  with  
147 clearly thicker sites at the cell indents (Fig. 4b). By visualising the parts which were thicker than the  
148 average cell wall thickness (values  $> 0.88 \mu\text{m}$ ), loops of thicker cell wall became visible (Supp. Video  
149 3). In week 10, the average cell wall thickness doubled ( $1.62 \pm 0.44 \mu\text{m}$ ), the loops remained, but less  
150 pronounced due to the thicker walls near the indents (values  $> 1.62 \mu\text{m}$ ) (Supp. Fig 4a, Supp. Video 4).  
151 In order to follow the chemical composition of the cell wall in context with the microstructure, Raman  
152 imaging (Gierlinger 2018) was performed on freshly cut cross-sections from week 8, focussing on the  
153 cell wall of the indents (Fig. 4c). Integration of the CH –stretching region from  $2831\text{-}3009 \text{ cm}^{-1}$  maps  
154 all organic materials of the region of interest. Non-negative matrix factorization (NMF) (Prats-Mateu et  
155 al. 2018) unmixed two cell wall endmembers with different chemical composition (Fig. 4d). One  
156 endmember spectrum revealed mainly cellulose signals (blue spectrum with bands at  $1095$  and  $1380 \text{ cm}^{-1}$   
157 <sup>1</sup> and was found in the tip of the indents (Fig. 4c). In contrast, the second endmember included clear  
158 pectin signals (Fig. 4d, green spectrum with pectin marker band at  $843 \text{ cm}^{-1}$ ) and was mainly found on  
159 the sides of the ICS (where the middle lamella is located) (Fig. 4c). Sections collected in week 10  
160 confirmed also higher pectin accumulation at the corners of the ICS and a high cellulose signal at the  
161 indent and along the cell walls (Supp. Fig 4b, c).

162



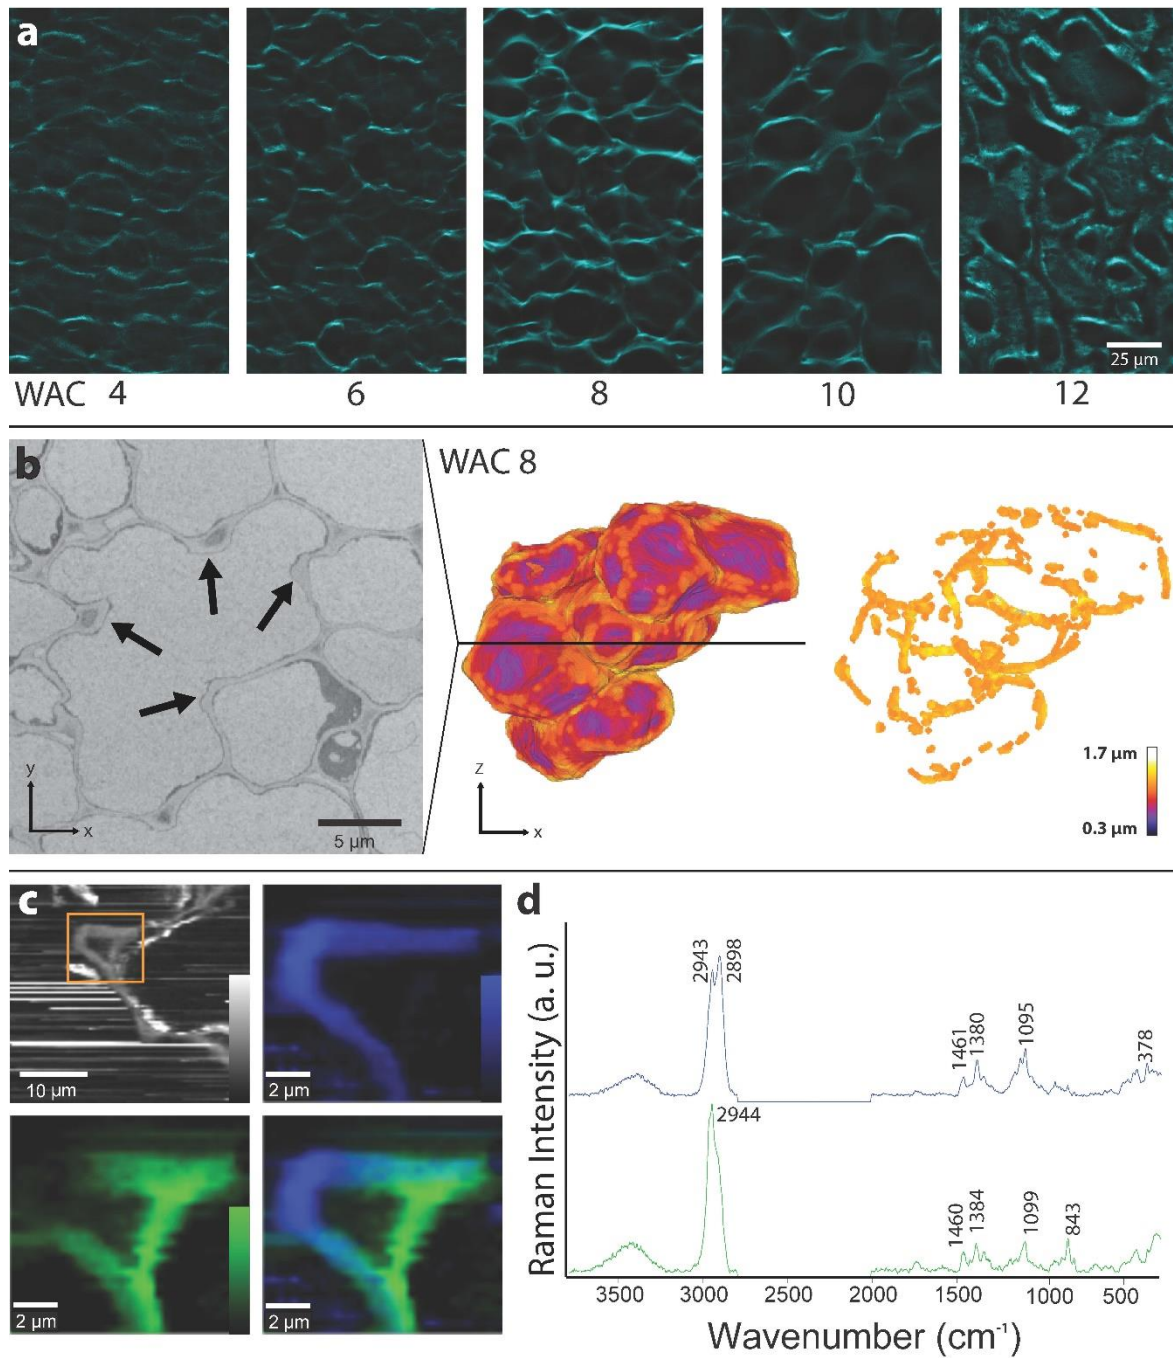

163

164 **Fig. 4 Cell wall thickening and cellulose deposition** a) MeOH fixed and de-colored sections of all developmental  
 165 stages after calcofluor white staining show loops of cellulose all over the tissue in week 8 and week 10. In week  
 166 12, only the secondary cell wall towards the lumen is still unlignified and thus the only part which is stained. b)  
 167 One section of the SBF-SEM stack located along the black line in the 3D model. Cell showed lobes due to several  
 168 indents (arrow). The cell wall was visualized based on thickness. After removing cell wall elements, which are  
 169 thinner than the average cell thickness, loops become visible. c) Raman imaging of a section: integrating the CH-  
 170 stretching region from 2831-3009  $\text{cm}^{-1}$  revealed the organic material of the cell wall and deposits along the cell  
 171 wall. A zoom into the indent region based on non-negative matrix factorization (NMF) highlighted cellulose (blue)  
 172 on the indent tip and pectin accumulation (green) on the sides and the opposite site of the ICS. d) The endmember  
 173 spectra confirm pure cellulose on the indent (blue) and a pectin rich region (green).

174

175

176

## 177 **Discussion**

178 Walnut fruits showed the strongest increase in fresh weight between end of May to mid of July (WAC  
179 4 to 12), which is confirmed by other studies on walnut fruit development (Drossopoulos et al. 1996,  
180 Pinney and Polito 1983). Our investigation focussing on the shell development in this period revealed  
181 strong changes in cell shape - from small isodiametric to big polylobate cells. Especially between week  
182 6 and week 10, the cells had the strongest volume and surface increase and formed the lobes.

### 183 *Lobe formation of cells of walnut shell tissue*

184 The formation of irregular cell shapes is well studied in epidermal cells of *Arabidopsis thaliana*  
185 (Sampathkumar et al. 2014, Sapala et al. 2018, Altartouri et al. 2019, Bidhendi et al. 2019). Our findings  
186 in the shell of walnut showed similar features during development. In the beginning of development cell  
187 walls were straight between two freshly divided cells (Fig. 5a). With continuous age and size, the cell  
188 wall started to undulate which leads to a concave appearance of some contact faces to neighbouring cells  
189 (Fig. 5b). The reason for this undulation can be due to changes in stiffness of the cell wall or changes in  
190 pectin composition (Haas et al. 2020, Altartouri et al. 2019, Majda et al. 2017). At the innermost part of  
191 the concave cell wall, higher stresses caused by turgor pressure will arise, similar to the epidermal cells  
192 of *A. thaliana* (Sapala et al. 2018). However, contrary to *A. thaliana*, walnut shell cells expand non-  
193 uniformly in 3D causing loop like stress patterns. To counteract these stresses cellulose is deposited  
194 along the future indents to thicken the wall – a process that is probably mediated by cortical microtubules  
195 and leads to the observed loops of cellulose (Fig. 5c, Supp. Video 5). These cellulosic thickenings likely  
196 hinder expansion at the formed indents and the expansion of the cell toward neighbouring cell corners  
197 is promoted. The difference in expansion caused by thicker walled indents is measured by Elsner et al.  
198 (2018) in *A. thaliana*, where tip regions of indents expand slower than the side regions.

199 In our study, we showed that the restriction of expansion was so strong that cell contacts to the  
200 neighbouring cells were lost at the indents and an ICS was formed. In the beginning the ICS was filled  
201 by strongly stained materials, later the ICS opened completely and the contact to the adjacent cell wall  
202 was lost (Fig. 5d). Raman images showed high pectin signals at the edges of the ICS close to the middle  
203 lamella. As pectin not only holds the cells together via the middle lamella but also controls the separation  
204 of cells (Daher and Braybrook 2015), especially at cell corners and along the ICS turgor mediated forces  
205 are highest (Javis 1998). At these locations high amounts of the highly de-esterified homogalacturonan  
206 are presented, which increase the viscosity of the cell wall matrix via  $\text{Ca}^{2+}$  bridges and delimit cell wall  
207 separation and ICS formation (Sotiriou et al. 2018, Giannoutsou et al. 2013, Parker et al. 2001, Knox et  
208 al. 1990).

209 However, in walnut, the stiff restrictions and the strong cell expansion formed new ICS all along the  
210 cells, which is more analogue to mesophyll tissue of *Zea mays* (Giannoutsou et al. 2013) or *Vigna*  
211 *sinensis* (Sotiriou et al. 2016) than to epidermal tissue, where cell-cell contact is continuous (Sotiriou et  
212 al. 2018). In *Z. mays*, cellulose deposition is parallel to cortical microtubule orientation, which form  
213 ring-like thickenings around the whole cell perpendicular to the leaf axis (Apostolakos et al. 1991). It is

214 shown that during tissue expansion cells become lobed due to cellulose depositions and the resulting  
215 ICS becomes continuously bigger. The same mechanism for lobe formation can be proposed for cells of  
216 the walnut shell but, contrary to *Z. mays*, the loops of cell wall thickenings are not orientated but  
217 randomly distributed. Therefore, each individual cell shapes and gets shaped by other cells when they  
218 expand into new ICS between cells, where the walls exhibit less resistance. This leads to the observed  
219 variability of cell shapes in the shell tissue and the network-like appearance of the ICS (Supp. Fig 5).  
220 As development proceeds, cellulose was deposited along the whole cell wall, reducing the local  
221 variability in thickness and therefore the loops became less pronounced.  
222 Cell expansion and lobe formation ended with the onset of secondary cell wall formation and  
223 incorporation of lignin into the primary cell wall, as indicated by stronger staining in SEM pictures (Fig.  
224 5e) and is confirmed in previous studies (Antreich et al. 2019, Xiao et al. 2020).  
225

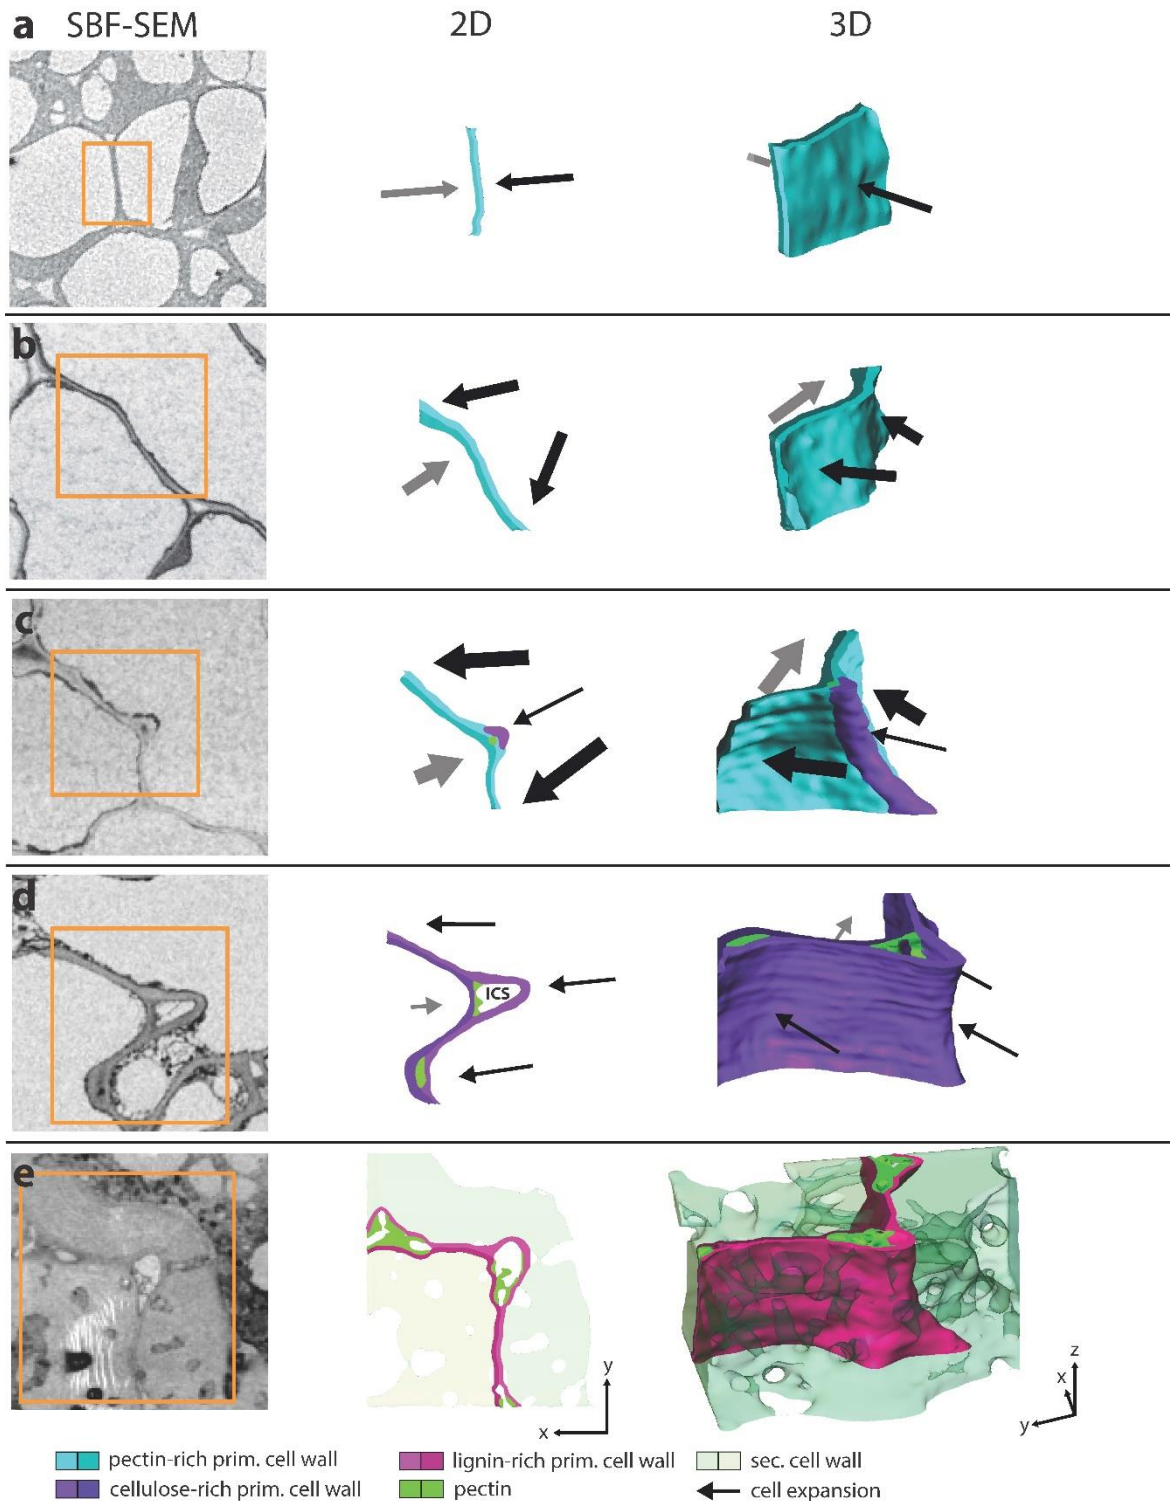

226

227 **Fig. 5 Mechanism of lobe formation in walnut shell:** representative sections showing the cell wall of neighboring  
 228 cells in each developmental stage (same scaling), a 2D-sketch and a 3D visualization of the same area shows the  
 229 formation of the indent. **a)** After cell division the cell wall is straight and cell expansion is weak (thickness of  
 230 arrows represents expansion speed and direction). **b)** The cell expands faster, and the cell wall starts to undulate,  
 231 causing different expansion directions of the neighboring cells. **c)** Due to higher cell wall stresses at the curved  
 232 section, cellulose gets deposited and the thickness increase at this location. The cell expands further but less strong  
 233 at this position and an indent starts to form. A small intercellular space (ICS) is created, first filled completely.  
 234 The opposite cell expands off-plane and forms another loop of wall thickening. **d)** Later during cell growth, the  
 235 ICS gets bigger and shows an open space, sometimes exhibit protrusions. The whole cell wall becomes richer in  
 236 cellulose and cells expand less strong. **e)** Finally, secondary cell wall is deposited, and the primary cell wall gets  
 237 lignified, which stops the cell expansion.

238

239 *Lobed cell shape is beneficial for stress resistance on the cell and tissue level*

240 The change from isodiametric to polylobate cells happens mainly within 4 weeks. All shape descriptors  
241 significantly changed within this period. More lobes are formed (more skeleton endpoints) and became  
242 more pronounced (reduced solidity), which led to a drastic increase in contact area to neighboring cells.  
243 As shown in seeds of *Portulaca oleracea*, the wavy sutural interface between neighboring cells of the  
244 seed coat increase overall strength and fracture toughness compared to straight cell interfaces (Gao et  
245 al. 2018). In the same way the interlocking of the polylobate sclereid cells in walnut lead to high values  
246 in tensile and compression tests on the tissue level (Antreich et al. 2019, Huss et al. 2020). On the cellular  
247 level, cells kept their LES low during development to reduce high stresses on the cell wall analogue to  
248 epidermal cells in *A. thaliana* (Sapala et al. 2018). So, the polylobate cell shape has two functions: on  
249 the one hand, it reduces internal stresses on the cell wall during development and, on the other hand, it  
250 increases tensile and compression strength of the whole mature shell tissue. Models derived from plant  
251 samples show that cell size and shape with its mechanical constraints influence tissue growth in 2D  
252 (Sapala et al. 2018) and 3D (Bassel et al. 2014). Additionally, the surrounding tissues could have a  
253 strong influence on tissue morphogenesis. As shown in *A. thaliana* seeds, the pressure of the endosperm  
254 and the restriction of the seed coat affect microtubule orientation and cell wall thickening of  
255 mechanosensitive cells (Creff et al. 2015, Beauzamy et al. 2016). In the case of the walnut, mechanical  
256 interactions may derive from the expanding embryo and the restricting husk forcing the cells of the shell  
257 to interlock. Under these assumptions it would be interesting to use our data to create 3D finite element  
258 models on cellular level to shed more light on the morphogenesis of the whole walnut shell tissue.

259 *New insights into walnut development due to 3D visualization*

260 SF-M and SBF-SEM are promising tools to study the morphogenesis of plant organs and tissues in 3D.  
261 In our study, SF-M is a simple and cheap tool to give insights into young and soft tissues, where X-ray  
262 computer tomography methods reach their limitation regarding the loss of contrast due to water content  
263 and loss of sharpness due to movements of the sample (Kaminuma et al. 2008, Kuroki et al. 2004).  
264 Especially with samples showing differently colored tissues, the colored pictures unfold their full  
265 potential. Contrary, SBF-SEM gives insights into cell organization with impressively high resolution.  
266 Studies on microtubules of the mitotic spindle in human cells (Nixon et al. 2017) or on ER organization  
267 in *Z. mays* (Arcalis et al. 2020) are the beginning trend in 3D ultrastructure investigation (Smith &  
268 Starborg 2018). Also, in this study, SBF-SEM allowed us to analyze for the first time the shape  
269 transformation of the 3D sclereid puzzle cells in walnut shell tissue. Furthermore, complex structures  
270 like ICS network can be visualized in 3D in more detail than using casting methods (Prat et al. 1997)  
271 and is independent of gas-filled space needed for X-ray computer tomography scans (Kuroki et al. 2004).  
272 Further, SBF-SEM could be of big interest in the study of cell development in *A. thaliana* to establish  
273 life like 3D models to better understand the role of periclinal walls in the formation of undulating cell  
274 walls (Majda et al. 2017, Majda et al. 2019, Bidhendi, 2019).

275 Finally, the combined use of state-of-the art 3D-characterisation and micro spectroscopic methods will  
276 shed new light on still open questions, e.g., the stiffness differences in the beginning of cell wall  
277 undulation or the distribution of microtubules during lobe formation. Revealing the whole formation  
278 process of the 3D sclereid puzzle cells in walnut and comparing it with shells of other nuts will help us  
279 to understand the general concept of shell morphogenesis in plants.

280

281

## 282 **Materials and Methods**

### 283 *Sampling*

284 We collected walnuts in 1-week intervals throughout the year 2019, starting from end of April until end  
285 of September, from the horticulture garden of BOKU, Vienna. Walnuts grew on a >40-year-old tree of  
286 the cultivar ‘Geisenheim 120’. Always 5 nuts were collected from the sunny side of the tree put into  
287 plastic bags and immediately brought to the labs for further investigation.

288

### 289 *Fresh weight, size, serial face-microtomy (SF-M)*

290 Each week the fresh weight, length and diameter of each nut was measured. Every two weeks (from  
291 week 4 to 12) one of the five walnuts was used for the SF-M. Another walnut was used for the Serial  
292 Block Face-Scanning Electron Microscope (SBF-SEM), calcofluor white staining and Raman  
293 microscopy analysis. All other nuts were frozen at -20°C for later use. For the SF-M the walnut was  
294 kept in the cryostat microtome (CM3050 S, Leica Biosystems, Nussloch, Germany) for 1-4h (depending  
295 on the nut size) at -20°C until all liquids in the walnut were frozen. A camera was mounted in front of  
296 the walnut and after each 30-100µm cut (depending on the walnut size) with the microtome knife a  
297 photo was made. As the sample holder moves toward the knife, the camera position needed no changing  
298 during the cutting. The acquired picture stacks of the whole nuts were processed and registered in ImageJ  
299 (NIH, Bethesda, Maryland) with the plugin ‘Linear stack alignment with SWIFT’ using the standard  
300 settings (Rueden et al. 2017). Then the aligned stack was segmented in the Software Amira (Thermo  
301 Fisher Scientific, Waltham, Massachusetts) into seed, soft shell, hard shell and husk, followed by 3D-  
302 reconstruction.

303

### 304 *SBF-SEM*

305 Around 1 mm x 1 mm x 1mm small pieces of walnut shell were trimmed with a razor blade, always  
306 from the mid region of the nut close to the suture. Trimmed pieces were immersed immediately in  
307 fixation solution containing 3% glutaraldehyde in 100 mM sodium cacodylate (pH7.4) and stored at 4°C  
308 overnight. Samples were rinsed 3 times with 150 mM cacodylate buffer and post fixed with 2% osmium

309 tetroxide and 0.2% ruthenium red in 150 mM cacodylate buffer for 1 hour at room temperature. After 5  
310 times washing with cacodylate buffer, samples were incubated in freshly prepared thiocarbohydrazide  
311 solution (1% w/v in dH<sub>2</sub>O) for 45 minutes, followed by 3 times washing with dH<sub>2</sub>O and post-fixed a  
312 second time with a 2% osmium solution for 1 hour. Samples were washed again 4 times with dH<sub>2</sub>O  
313 immersed in 0.5% uranyl acetate and stored overnight at 4°C. Again, samples were washed 5 times in  
314 dH<sub>2</sub>O and then transferred in Waltron's lead aspartate solution for 30 min at 65°C, followed by 5 times  
315 washing in dH<sub>2</sub>O. Dehydration was performed in 30%, 50%, 70%, 90%, 100%, 100% ethanol in water,  
316 followed by 100%, 100% acetone; each 30 minutes at room temperature. Samples were then infiltrated  
317 by 25% low-viscosity resin in acetone and left at 4°C overnight. Then samples were transferred into  
318 50% and further into 75% resin, 4 hours each, until 100% resin overnight at 4°C, followed by a second  
319 round of 100% resin for 6h at room temperature. Samples were then embedded in flat embedding moulds  
320 and polymerised at 65°C for 48 hours. Resin blocks were trimmed with a glass knife on a UC-7  
321 ultramicrotome (Leica Microsystems, Vienna, Austria) to 0.5 mm<sup>3</sup> and glued with silver cement on a  
322 stub. They were coated with a 10 nm gold layer in an EM SCD005 sputter coater (Leica Microsystems,  
323 Vienna, Austria) and mounted on the microtome of the VolumeScope SEM (Thermo Fisher Scientific,  
324 Waltham, Massachusetts). Scans of 100 µm<sup>2</sup> were acquired with 1.18 kV, 100 pA, and 3 µs dwell time.  
325 Approximately 1000 slices with a slicing depth of 100 nm were made, controlled by the software Maps  
326 3.4 VS (Thermo Fisher Scientific, Waltham, Massachusetts). The resulting stacks were scaled to a  
327 useable size (around 1000 x 1000 x 100 px) for the Amira software and registered in ImageJ with the  
328 plugin 'Linear stack alignment with SWIFT' using the standard settings. All whole cells were segmented  
329 manually, which were not cut off by the border. From each segmented cell surface/volume, convex hull  
330 surface/volume and contact surfaces between each neighbouring cell was calculated in the software  
331 Amira. Additionally, lobe number was calculated by the centreline tree function (tube parameter: slope:  
332 1.2, zeroVal 3.5). This made a skeleton of the cells in 3D but was very sensitive to rough cell shape.  
333 Therefore, the segmented cells were smoothed to eliminate selection artefacts, so that only main lobes  
334 were counted. Finally, the largest empty sphere (LES) of each cell was calculated with the 'Thickness'  
335 function of the ImageJ plugin BoneJ (Dougherty & Kunzelmann, 2007). 3D-reconstruction of all cells  
336 (inclusively cell shape descriptors) were done in the software Amira.

337

### 338 *Confocal Laser Scanning Microscopy (CLSM)*

339 Small pieces of shell tissue were cut out close to suture and fixed and de-coloured according to Pasternak  
340 et al. (2015) with minor changes to stain cellulose with calcofluor white. Samples were put into an  
341 Eppendorf tube with 1.5 ml pure MeOH for 20 min at 37°C. Afterwards the sample was transferred into  
342 0.8 ml fresh pure MeOH for another 3 min, then 200 µl dH<sub>2</sub>O was added in 2 min intervals until reaching  
343 2 ml in total. After this, samples were washed twice with dH<sub>2</sub>O for 5 min each. Afterwards samples  
344 were transferred on a glass slide, stained with one drop of a ready-to use calcofluor white stain solution  
345 (Sigma-Aldrich) containing 1 g/l calcofluor white M2R and 0.5 g/l evans blue and then mounted on a

346 TCS SP5 II CLSM (Leica Microsystems, Vienna, Austria). As emission source a 405 nm UV diode was  
347 used, and detection range was set from 450 to 500 nm. Pictures were made with the same magnification  
348 using a 40x/0.85 objective and a resolution of 0.2  $\mu\text{m}$ .

349

### 350 *Confocal Raman Microscopy*

351 From small blocks of frozen walnut shells 20-30  $\mu\text{m}$  thin sections were cut in the cryostat microtome  
352 and transferred on a standard glass slide. Samples were washed several times with dH<sub>2</sub>O, followed by  
353 D<sub>2</sub>O and sealed with nail polish for Raman microscopic measurements. Spectra were acquired from  
354 micro sections using a confocal Raman microscope (alpha300RA, WITec, Ulm, Germany) equipped  
355 with a 100 $\times$  oil immersion objective (NA 1.4, Carl Zeiss, Jena, Germany) and a piezoelectric scan stage.  
356 A laser ( $\lambda = 532$  nm) was passed through a polarization-preserving single-mode optical fibre and focused  
357 through the objective with a spatial resolution of 0.3  $\mu\text{m}$  on the sample. The Raman scattering signal  
358 was detected by a CCD camera (Andor DV401 BV, Belfast) behind a spectrometer (600 g  $\text{mm}^{-1}$  grating,  
359 UHTS 300 WITec, Ulm, Germany). The laser power was 40mW. For measurement setup the software  
360 Control Four (WITec, Ulm, Germany) was used. Raman analysis was performed with Project FOUR  
361 (WITec, Ulm, Germany) and Opus 7.5 software (Bruker Optik GmbH, Ettlingen, Germany). After  
362 applying cosmic ray spike removal, Raman chemical images were generated based on the integration of  
363 relevant wavenumber regions (e.g., CH stretching). The indent was selected, and a non-negative matrix  
364 factorization (NMF) was performed in Project FOUR with six basis spectra.

365

### 366 *Statistics*

367 Data were analysed with the software SigmaPlot 12 (Systat Software, San Jose, California) for  
368 significant differences between each development stage. On all data from the cell segmentation a  
369 Kruskal-Wallis one-way analysis of variances on ranks was performed followed by Dunn's Method to  
370 compare all ranks. Significant differences ( $p < 0.05$ ) were marked in the figures with \*.

371

372

### 373 **Acknowledgements**

374 The authors thank the whole BIONAMI group for all the help and comments. We also thank Karl  
375 Refenner for giving us access to the walnut tree on the horticultural garden of BOKU, Vienna. Thanks  
376 to Ingeborg Lang for critical reading of the manuscript and to Elsa Arcalis and Ulrike Hörmann-Dietrich  
377 for providing chemicals and lab space for the SBF-SEM sample preparation.  
378 The authors acknowledge funding from the European Research Council (ERC) under the European  
379 Union's Horizon 2020 research and innovation program grant agreement No 681885 and the HSRM  
380 Project NANOBILD for infrastructure support.



381

382 **Competing interests**

383 The authors declare no conflict of interest.

384

385 **References**

386 Altartouri, B., Bidhendi, A. J., Tani, T., Suzuki, J., Conrad, C., Chebli, Y., Liu, N.,  
387 Karunakaran, C., Scarcelli, G., & Geitmann, A. (2019). Pectin chemistry and cellulose  
388 crystallinity govern pavement cell morphogenesis in a multi-step mechanism. *Plant*  
389 *Physiology*, *181*(1), 127–141. <https://doi.org/10.1104/pp.19.00303>

390 Antreich, S. J., Xiao, N., Huss, J. C., Horbelt, N., Eder, M., Weinkamer, R., & Gierlinger, N.  
391 (2019). The puzzle of the walnut shell: a novel cell type with interlocked packing.  
392 *Advanced Science*, *1900644*, 1–7. <https://doi.org/10.1002/advs.201900644>

393 Arcalís, E., Hörmann-Dietrich, U., Zeh, L., & Stoger, E. (2020). 3D Electron Microscopy  
394 Gives a Clue: Maize Zein Bodies Bud From Central Areas of ER Sheets. *Frontiers in*  
395 *Plant Science*, *11*(June), 1–7. <https://doi.org/10.3389/fpls.2020.00809>

396 Baskin, T. I. (2005). Anisotropic expansion of the plant cell wall. *Annual Review of Cell and*  
397 *Developmental Biology*, *21*, 203–222.  
398 <https://doi.org/10.1146/annurev.cellbio.20.082503.103053>

399 Bassel, G. W., Stamm, P., Mosca, G., De Reuille, P. B., Gibbs, D. J., Winter, R., Janka, A.,  
400 Holdsworth, M. J., & Smith, R. S. (2014). Mechanical constraints imposed by 3D  
401 cellular geometry and arrangement modulate growth patterns in the Arabidopsis embryo.  
402 *Proceedings of the National Academy of Sciences of the United States of America*,  
403 *111*(23), 8685–8690. <https://doi.org/10.1073/pnas.1404616111>

404 Beauzamy, L., Fourquin, C., Dubrulle, N., Boursiac, Y., Boudaoud, A., & Ingram, G. (2016).  
405 Endosperm turgor pressure decreases during early Arabidopsis seed development.  
406 *Development (Cambridge)*, *143*(18), 3295–3299. <https://doi.org/10.1242/dev.137190>

- 407 Bidhendi, A. J., & Geitmann, A. (2016). Relating the mechanics of the primary plant cell wall  
408 to morphogenesis. *Journal of Experimental Botany*, 67(2), 449–461.  
409 <https://doi.org/10.1093/jxb/erv535>
- 410 Bidhendi, A. J., Altartouri, B., Gosselin, F. P., & Geitmann, A. (2019). Mechanical stress  
411 initiates and sustains the morphogenesis of wavy leaf epidermal cells. *Cell Reports*,  
412 28(5), 1237–1250.e6. <https://doi.org/10.1016/j.celrep.2019.07.006>
- 413 Cosgrove, D. J. (2018). Diffuse growth of plant cell walls. *Plant Physiology*, 176(1), 16–27.  
414 <https://doi.org/10.1104/pp.17.01541>
- 415 Creff, A., Brocard, L., & Ingram, G. (2015). A mechanically sensitive cell layer regulates the  
416 physical properties of the Arabidopsis seed coat. *Nature Communications*, 6(February),  
417 1–8. <https://doi.org/10.1038/ncomms7382>
- 418 Daher, F. B., Chen, Y., Bozorg, B., Clough, J., Jönsson, H., & Braybrook, S. A. (2018).  
419 Anisotropic growth is achieved through the additive mechanical effect of material  
420 anisotropy and elastic asymmetry. *ELife*, 7, 1–28. <https://doi.org/10.7554/eLife.38161>
- 421 Daher, F. B., & Braybrook, S. A. (2015). How to let go: Pectin and plant cell adhesion.  
422 *Frontiers in Plant Science*, 6(JULY), 1–8. <https://doi.org/10.3389/fpls.2015.00523>
- 423 Dougherty, R., & Kunzelmann, K.-H. (2007). Computing local thickness of 3D structures  
424 with ImageJ. *Microscopy and Microanalysis*, 13(S02), 1678–1679.  
425 <https://doi.org/10.1017/s1431927607074430>
- 426 Drossopoulos, J. B., Kouchaji, G. G., & Bouranis, D. L. (1996). Seasonal dynamics of  
427 mineral nutrients by walnut tree fruits. *Journal of Plant Nutrition*, 19(2), 435–455.  
428 <https://doi.org/10.1080/01904169609365133>
- 429 Elsner, J., Lipowczan, M., & Kwiatkowska, D. (2018). Differential growth of pavement cells  
430 of Arabidopsis thaliana leaf epidermis as revealed by microbead labeling. *American*  
431 *Journal of Botany*, 105(2), 257–265. <https://doi.org/10.1002/ajb2.1021>
- 432 Giannoutsou, E., Sotiriou, P., Apostolakos, P., & Galatis, B. (2013). Early local  
433 differentiation of the cell wall matrix defines the contact sites in lobed mesophyll cells of  
434 *Zea mays*. *Annals of Botany*, 112(6), 1067–1081. <https://doi.org/10.1093/aob/mct175>

- 435 Gonzalez, N., Vanhaeren, H., & Inzé, D. (2012). Leaf size control: Complex coordination of  
436 cell division and expansion. *Trends in Plant Science*, *17*(6), 332–340.  
437 <https://doi.org/10.1016/j.tplants.2012.02.003>
- 438 Gutierrez, R., Lindeboom, J. J., Paredes, A. R., Emons, A. M. C., & Ehrhardt, D. W. (2009).  
439 Arabidopsis cortical microtubules position cellulose synthase delivery to the plasma  
440 membrane and interact with cellulose synthase trafficking compartments. *Nature Cell  
441 Biology*, *11*(7), 797–806. <https://doi.org/10.1038/ncb1886>
- 442 Haas, K. T., Wightman, R., Meyerowitz, E. M., & Peaucelle, A. (2020). Pectin  
443 homogalacturonan nanofilament expansion drives morphogenesis in plant epidermal  
444 cells. *Science*, *367*(6481), 1003–1007. <https://doi.org/10.1126/science.aaz5103>
- 445 Huss, J. C., Antreich, S. J., Bachmayr, J., Xiao, N., Eder, M., Konnerth, J., & Gierlinger, N.  
446 (2020). Topological Interlocking and Geometric Stiffening as Complementary Strategies  
447 for Strong Plant Shells. *Advanced Materials*, *2004519*, 1–7.  
448 <https://doi.org/10.1002/adma.202004519>
- 449 Kaminuma, E., Yoshizumi, T., Wada, T., Matsui, M., & Toyoda, T. (2008). Quantitative  
450 analysis of heterogeneous spatial distribution of Arabidopsis leaf trichomes using micro  
451 X-ray computed tomography. *Plant Journal*, *56*(3), 470–482.  
452 <https://doi.org/10.1111/j.1365-313X.2008.03609.x>
- 453 Kierzkowski, D., & Routier-Kierzkowska, A. L. (2019). Cellular basis of growth in plants:  
454 geometry matters. *Current Opinion in Plant Biology*, *47*, 56–63.  
455 <https://doi.org/10.1016/j.pbi.2018.09.008>
- 456 Kuroki, S., Oshita, S., Sotome, I., Kawagoe, Y., & Seo, Y. (2004). Visualization of 3-D  
457 network of gas-filled intercellular spaces in cucumber fruit after harvest. *Postharvest  
458 Biology and Technology*, *33*(3), 255–262.  
459 <https://doi.org/10.1016/j.postharvbio.2004.04.002>
- 460 Lampugnani, E. R., Kahn, G. A., Somssich, M., & Staffan, P. (2018). Building a plant cell  
461 wall at a glance. *Journal of Cell Science*, *131*, 1–6. <https://doi.org/10.1242/jcs.207373>

- 462 Landrein, B., & Ingram, G. (2019). Connected through the force: Mechanical signals in plant  
463 development. *Journal of Experimental Botany*, 70(14), 3507–3519.  
464 <https://doi.org/10.1093/jxb/erz103>
- 465 Majda, M., Krupinski, P., Jönsson, H., Hamant, O., & Robert, S. (2019). Mechanical  
466 Asymmetry of the cell wall predicts changes in pavement cell geometry. *Developmental*  
467 *Cell*, 50(1), 9–10. <https://doi.org/10.1016/j.devcel.2019.06.002>
- 468 Majda, M., Grones, P., Sintorn, I. M., Vain, T., Milani, P., Krupinski, P., Zagórska-Marek, B.,  
469 Viotti, C., Jönsson, H., Mellerowicz, E. J., Hamant, O., & Robert, S. (2017).  
470 Mechanochemical polarization of contiguous cell walls shapes plant pavement cells.  
471 *Developmental Cell*, 43(3), 290-304.e4. <https://doi.org/10.1016/j.devcel.2017.10.017>
- 472 Marry, M., Roberts, K., Jopson, S. J., Huxham, I. M., Jarvis, M. C., Corsar, J., Robertson, E.,  
473 & McCann, M. C. (2006). Cell-cell adhesion in fresh sugar-beet root parenchyma  
474 requires both pectin esters and calcium cross-links. *Physiologia Plantarum*, 126(2), 243–  
475 256. <https://doi.org/10.1111/j.1399-3054.2006.00591.x>
- 476 Nixon, F. M., Honnor, T. R., Clarke, N. I., Starling, G. P., Beckett, A. J., Johansen, A. M.,  
477 Brettschneider, J. A., Prior, I. A., & Royle, S. J. (2017). Microtubule organization within  
478 mitotic spindles revealed by serial block face scanning electron microscopy and image  
479 analysis. *Journal of Cell Science*, 130(10), 1845–1855.  
480 <https://doi.org/10.1242/jcs.203877>
- 481 Peaucelle, A., Wightman, R., & Höfte, H. (2015). The Control of Growth Symmetry Breaking  
482 in the Arabidopsis Hypocotyl. *Current Biology*, 25(13), 1746–1752.  
483 <https://doi.org/10.1016/j.cub.2015.05.022>
- 484 Pinney, K., & Polito, V. S. (1983). English walnut fruit growth and development. *Scientia*  
485 *Horticulturae*, 21(1), 19–28. [https://doi.org/10.1016/0304-4238\(83\)90182-6](https://doi.org/10.1016/0304-4238(83)90182-6)
- 486 Pasternak, T., Tietz, O., Rapp, K., Begheldo, M., Nitschke, R., Ruperti, B., & Palme, K.  
487 (2015). Protocol: An improved and universal procedure for whole-mount  
488 immunolocalization in plants. *Plant Methods*, 11(1), 1–10.  
489 <https://doi.org/10.1186/s13007-015-0094-2>

- 490 Poeschl Y., Möller B., Müller L. and Bürstenbinder K. (2020), User-friendly assessment of  
491 pavement cell shape features with PaCeQuant: Novel functions and tools. *Methods in*  
492 *Cell Biology*, 160, 349-363. <https://doi.org/10.1016/bs.mcb.2020.04.010>
- 493 Rueden, C. T., Schindelin, J., Hiner, M. C., DeZonia, B. E., Walter, A. E., Arena, E. T., &  
494 Eliceiri, K. W. (2017). ImageJ2: ImageJ for the next generation of scientific image data.  
495 *BMC Bioinformatics*, 18(1), 1–26. <https://doi.org/10.1186/s12859-017-1934-z>
- 496 Sampathkumar, A., Krupinski, P., Wightman, R., Milani, P., Berquand, A., Boudaoud, A.,  
497 Hamant, O., Jönsson, H., & Meyerowitz, E. M. (2014). Subcellular and supracellular  
498 mechanical stress prescribes cytoskeleton behavior in Arabidopsis cotyledon pavement  
499 cells. *ELife*, 2014(3), 1–20. <https://doi.org/10.7554/eLife.01967.001>
- 500 Sapala, A., Runions, A., & Smith, R. S. (2019). Mechanics, geometry and genetics of  
501 epidermal cell shape regulation: different pieces of the same puzzle. *Current Opinion in*  
502 *Plant Biology*, 47, 1–8. <https://doi.org/10.1016/j.pbi.2018.07.017>
- 503 Sapala, A., Runions, A., Routier-Kierzkowska, A. L., Gupta, M. Das, Hong, L., Hofhuis, H.,  
504 Verger, S., Mosca, G., Li, C. B., Hay, A., Hamant, O., Roeder, A. H. K., Tsiantis, M.,  
505 Prusinkiewicz, P., & Smith, R. S. (2018). Why plants make puzzle cells, and how their  
506 shape emerges. *ELife*, 7, 1–32. <https://doi.org/10.7554/eLife.32794>
- 507 Schüler, P., Speck, T., Bührig-Polaczek, A., & Fleck, C. (2014). Structure-function  
508 relationships in *Macadamia integrifolia* seed coats - Fundamentals of the hierarchical  
509 microstructure. *PLoS ONE*, 9(8), 1–14. <https://doi.org/10.1371/journal.pone.0102913>
- 510 Smith, D., & Starborg, T. (2019). Serial block face scanning electron microscopy in cell  
511 biology: Applications and technology. *Tissue and Cell*, 57(August), 111–122.  
512 <https://doi.org/10.1016/j.tice.2018.08.011>
- 513 Sotiriou, P., Giannoutsou, E., Panteris, E., Galatis, B., & Apostolakos, P. (2018). Local  
514 differentiation of cell wall matrix polysaccharides in sinuous pavement cells: its possible  
515 involvement in the flexibility of cell shape. *Plant Biology*, 20(2), 223–237.  
516 <https://doi.org/10.1111/plb.12681>
- 517 Sotiriou, P., Giannoutsou, E., Panteris, E., Apostolakos, P., & Galatis, B. (2016). Cell wall  
518 matrix polysaccharide distribution and cortical microtubule organization: Two factors

519 controlling mesophyll cell morphogenesis in land plants. *Annals of Botany*, 117(3), 401–  
520 419. <https://doi.org/10.1093/aob/mcv187>

521 Vőfély, R. V., Gallagher, J., Pisano, G. D., Bartlett, M., & Braybrook, S. A. (2019). Of  
522 puzzles and pavements: a quantitative exploration of leaf epidermal cell shape. *New*  
523 *Phytologist*, 221(1), 540–552. <https://doi.org/10.1111/nph.15461>

524 Xiao, N., Bock, P., Antreich, S. J., Staedler, Y. M., Schőnenberger, J., & Gierlinger, N.  
525 (2020). From the soft to the hard: Changes in microchemistry during cell wall maturation  
526 of walnut shells. *Frontiers in Plant Science*, 11(April), 1–14.  
527 <https://doi.org/10.3389/fpls.2020.00466>

528
